# Supplementary material
Source: Research Square preprint supplement (doi:10.21203/rs.3.rs-9519932/v1)
Supplement: Supplementary file 2 [file d995678ec87f093102c0dc17.docx]

**Suplementary material**

**Combined toxicity of chlorpyrifos and nanoplastics in the marine amphipod *Parhyale hawaiensis*: implications for chlorpyrifos risk assessment in Latin American coasts**

Shirley V. Daniela Fonseca-Peñaa*; Juan de Jesús Chi-Domíngueza, Uriel Arreguin-Rebolledob; Marcela Cabrerac,Mariana V. Capparellia*

a Estación El Carmen, Instituto de Ciencias del Mar y Limnología, Universidad Nacional Autónoma de Mexico, Carretera Carmen-Puerto Real Km 9.5, 24157, Ciudad del Carmen, Campeche, Mexico.

bUnidad Académica Mazatlán, Instituto de Ciencias del Mar y Limnología, Universidad Nacional Autónoma de México, Calle Joel Montes Camarena s/n, Mazatlán Sinaloa 82000, Mexico.

cGrupo de Investigación de Recursos Hídricos y Acuáticos, Facultad de Ciencias de la Vida, Universidad Regional Amazónica Ikiam, Tena, Ecuador.

*Corresponding authors

E-mail: [mcapparelli@cmarl.unam.mx](mailto:mcapparelli@cmarl.unam.mx) (M. Capparelli)

E-mail: [shirleyvdanielafonsec@gmail.com](mailto:shirleyvdanielafonsec@gmail.com) (S.V.D. Fonseca-Peña)

**Culture quality (Control-chart)**


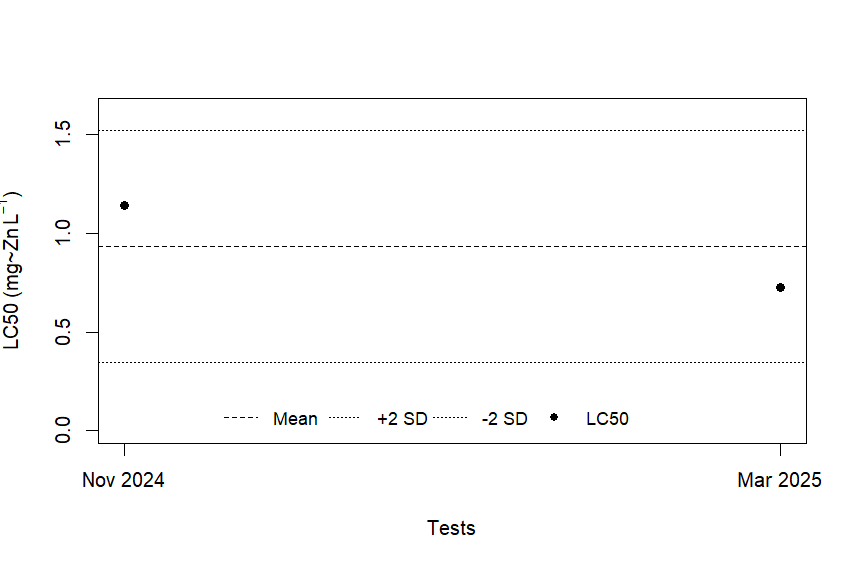


Figure S1. Culture quality of *Parhyale hawaiensis* with acute toxicity tests using zinc (Zn) as a reference toxicant during the test period. SD: standard deviation; LC50: mean lethal concentration.

Table S1. Operating conditions for the GC-NPD

| **Column** | Rtx-OPP2-30ms |
| --- | --- |
| **Gas carrier** | Helium |
| **Flow** | 1 ml min-1 |
| **Gradiente** | Initially 65 °C |
| 20 °C·min−1 to 180 °C (hold time of 2 min) |
| 5 °C·min−1 to 280 °C (hold time of 3 min) |
| **Injection volume** | 3 ul |
| **Injection temperature** | 250°C |
| **Injection mode** | Splitless |
| **Detector temperature** | 300°C |

Table S2. (A)Measured concentrations of chlorpyrifos at the initial and after four (4) days of exposure. B. Measured concentrations of chlorpyrifos in water in the presence of 100 µg/L polyethylene nanoparticles (NPs-Low). C. Measured concentrations of chlorpyrifos in water in the presence of 1000 µg/L polyethylene nanoparticles (NPs-High). Dissipation rate constant (k), half-life values (DT50). (ND) not detected, (-) not measured.

**A.**

| **Nominal concentration (µg/L)** | **Measured initial concentration (µg/L)** | **Measured concentration 4 days (µg/L)** | **K** | **DT50** | **Disspation %** |
| --- | --- | --- | --- | --- | --- |
|
| Control | ND | - |  |  |  |
| 0.01 | 0.01 | 0.009 | 0.03 | 26.32 | 10 |
| 0.1 | 0.12 | 0.09 | 0.07 | 9.64 | 25 |
| 1 | 0.98 | 0.6 | 0.12 | 5.65 | 39 |
| 10 | 12.02 | 6.4 | 0.16 | 4.40 | 47 |
| 100 | 101 | 39.9 | 0.23 | 2.99 | 60 |
|  |  |  | 0.12 | 9.80 |  |

**B.**

| **Nominal concentration (µg/L)** | **Measured initial concentration (µg/L)** | **Measured concentration 4 days (µg/L)** | **K** | **DT50** | **Disspation %** |
| --- | --- | --- | --- | --- | --- |
|
| 0.01+NPslow | 0.009 | 0.007 | 0.06 | 11.03 | 22 |
| 0.1+NPslow | 0.1 | 0.062 | 0.12 | 5.80 | 38 |
| 1+NPslow | 0.95 | 0.546 | 0.14 | 5.01 | 43 |
| 10+NPslow | 10 | 6.34 | 0.11 | 6.08 | 37 |
| 100+NPslow | 99 | 39.84 | 0.23 | 3.05 | 60 |
|  |  |  |  | 6.19 |  |

**C.**

| **Nominal concentration (µg/L)** | **Measured initial concentration (µg/L)** | **Measured concentration 4 days (µg/L)** | **K** | **DT50** | **Disspation %** |
| --- | --- | --- | --- | --- | --- |
|
| 0.01+NPshigh | 0.009 | 0.0052 | 0.14 | 5.05 | 42 |
| 0.1+NPshigh | 0.1 | 0.05 | 0.17 | 4.00 | 50 |
| 1+NPshigh | 0.95 | 0.5 | 0.16 | 4.32 | 47 |
| 10+NPshigh | 10 | 5.8 | 0.14 | 5.09 | 42 |
| 100+NPshigh | 99 | 39.31 | 0.23 | 3.00 | 60 |

Table S3. Results of the Cox proportional hazard model for: (A) Survival and (B) immobility of *Parhyale hawaiensis* exposed to chlorpyrifos and its mixtures with micro- and nanoplastics. N.C.: Negative control; M.C.: Methanol control; ns: not significant; ** Significant; *** Highly significant.

A.

| **Assay** | **Treatment** | **N** | **Events (Dead)** | **Hazard Ratios (IC95%)** | **p-value** |
| --- | --- | --- | --- | --- | --- |
| **CPF-alone** | N.C. | 31 | 0 | 1.0 (baseline) | ns |
|  | M.C. | 31 | 0 | 1.0 (baseline) | ns |
|  | 0.01 | 30 | 4 | 1.0 (baseline) | ns |
|  | 0.1 | 31 | 11 | 2.83 (0.90-8.88) | 0.075 |
|  | 1 | 28 | 15 | 5.91 (1.96-17.83) | 0.0016** |
|  | 10 | 28 | 26 | 15.85 (5.47-45.95) | <0.001*** |
|  | 100 | 32 | 32 | 53.06 (17.53-160.64) | <0.001*** |
| **CPF+MNPs_Low** | N.C. | 32 | 0 | 1.0 (baseline) | ns |
|  | M.C. | 32 | 0 | 1.0 (baseline) | ns |
|  | MNPs_Low(100) | 32 | 0 | 1.0 (baseline) | ns |
|  | 0.01 | 31 | 0 | 1.0 (baseline) | ns |
|  | 0.1 | 31 | 19 | 5.21x107 (3.05-8.90x107) | <0.001*** |
|  | 1 | 27 | 20 | 7.71x107 (4.58-1.30x108) | <0.001*** |
|  | 10 | 31 | 31 | 2.92x108 (1.87-4.65x108) | <0.001*** |
|  | 100 | 32 | 32 | 4.06x109 (1.83-8.99x109) | <0.001*** |
| **CPF+MNPs_High** | N.C. | 32 | 0 | 1.0 (baseline) | ns |
|  | M.C. | 32 | 0 | 1.0 (baseline) | ns |
|  | MNPs_High(1000) | 32 | 0 | 1.0 (baseline) | ns |
|  | 0.01 | 32 | 0 | 1.0 (baseline) | ns |
|  | 0.1 | 32 | 11 | 9.75x106 (4.99-19.06x106) | <0.001*** |
|  | 1 | 32 | 13 | 1.18x107 (6.27-22.12x106) | <0.001*** |
|  | 10 | 31 | 31 | 8.04x107 (5.09-12.71x107) | <0.001*** |
|  | 100 | 32 | 32 | 4.21x108 (2.42-7.33x108) | <0.001*** |

B.

| **Assay** | **Treatment** | **N** | **Events (immobile)** | **Hazard Ratios (IC95%)** | **p-value** |
| --- | --- | --- | --- | --- | --- |
| **CPF-alone** | N.C. | 31 | 0 | 1.0 (baseline) | 0.986 |
|  | M.C. | 31 | 0 | 1.0 (baseline) | 0.986 |
|  | 0.01 | 30 | 10 | 1.05 (0.55-2.02) | 0.878 |
|  | 0.1 | 31 | 11 | 1.05 (0.55-2.02) | 0.878 |
|  | 1 | 28 | 20 | 3.56 (2.12-5.99) | <0.001*** |
|  | 10 | 28 | 28 | 9.15 (5.58-15.02) | <0.001*** |
|  | 100 | 32 | 32 | 743.5 (166.8-3314.4) | <0.001*** |
| **CPF+MNPs_Low** | N.C. | 32 | 0 | 1.0 (baseline) | ns |
|  | M.C. | 32 | 0 | 1.0 (baseline) | ns |
|  | MNPs_Low(100) | 32 | 0 | 1.0 (baseline) | ns |
|  | 0.01+MNPs_Low | 31 | 0 | 1.0 (baseline) | ns |
|  | 0.1+MNPs_Low | 31 | 31 | 2.23x109 (1.41-3.51x109) | <0.001*** |
|  | 1+MNPs_Low | 27 | 22 | 6.81x108 (3.79x108-1.23x109) | <0.001*** |
|  | 10+MNPs_Low | 31 | 31 | 5.04x109 (3.18x109-7.97x109) | <0.001*** |
|  | 100+MNPs_Low | 32 | 32 | 2.10x1010 (1.20x1010-3.66x1010) | <0.001*** |
| **CPF+MNPs_High** | N.C. | 32 | 0 | 1.0 (baseline) | ns |
|  | M.C. | 32 | 0 | 1.0 (baseline) | ns |
|  | MNPs_High(1000) | 32 | 0 | 1.0 (baseline) | ns |
|  | 0.01+MNPs_High | 32 | 0 | 1.0 (baseline) | ns |
|  | 0.1+MNPs_High | 32 | 30 | 1.15x109 (0-∞) | - |
|  | 1+MNPs_High | 32 | 21 | 8.04x108 (0-∞) | - |
|  | 10+MNPs_High | 31 | 31 | 4.64x1010(0-∞) | - |
|  | 100+MNPs_High | 32 | 32 | 4.64x1010 (0-∞) | - |


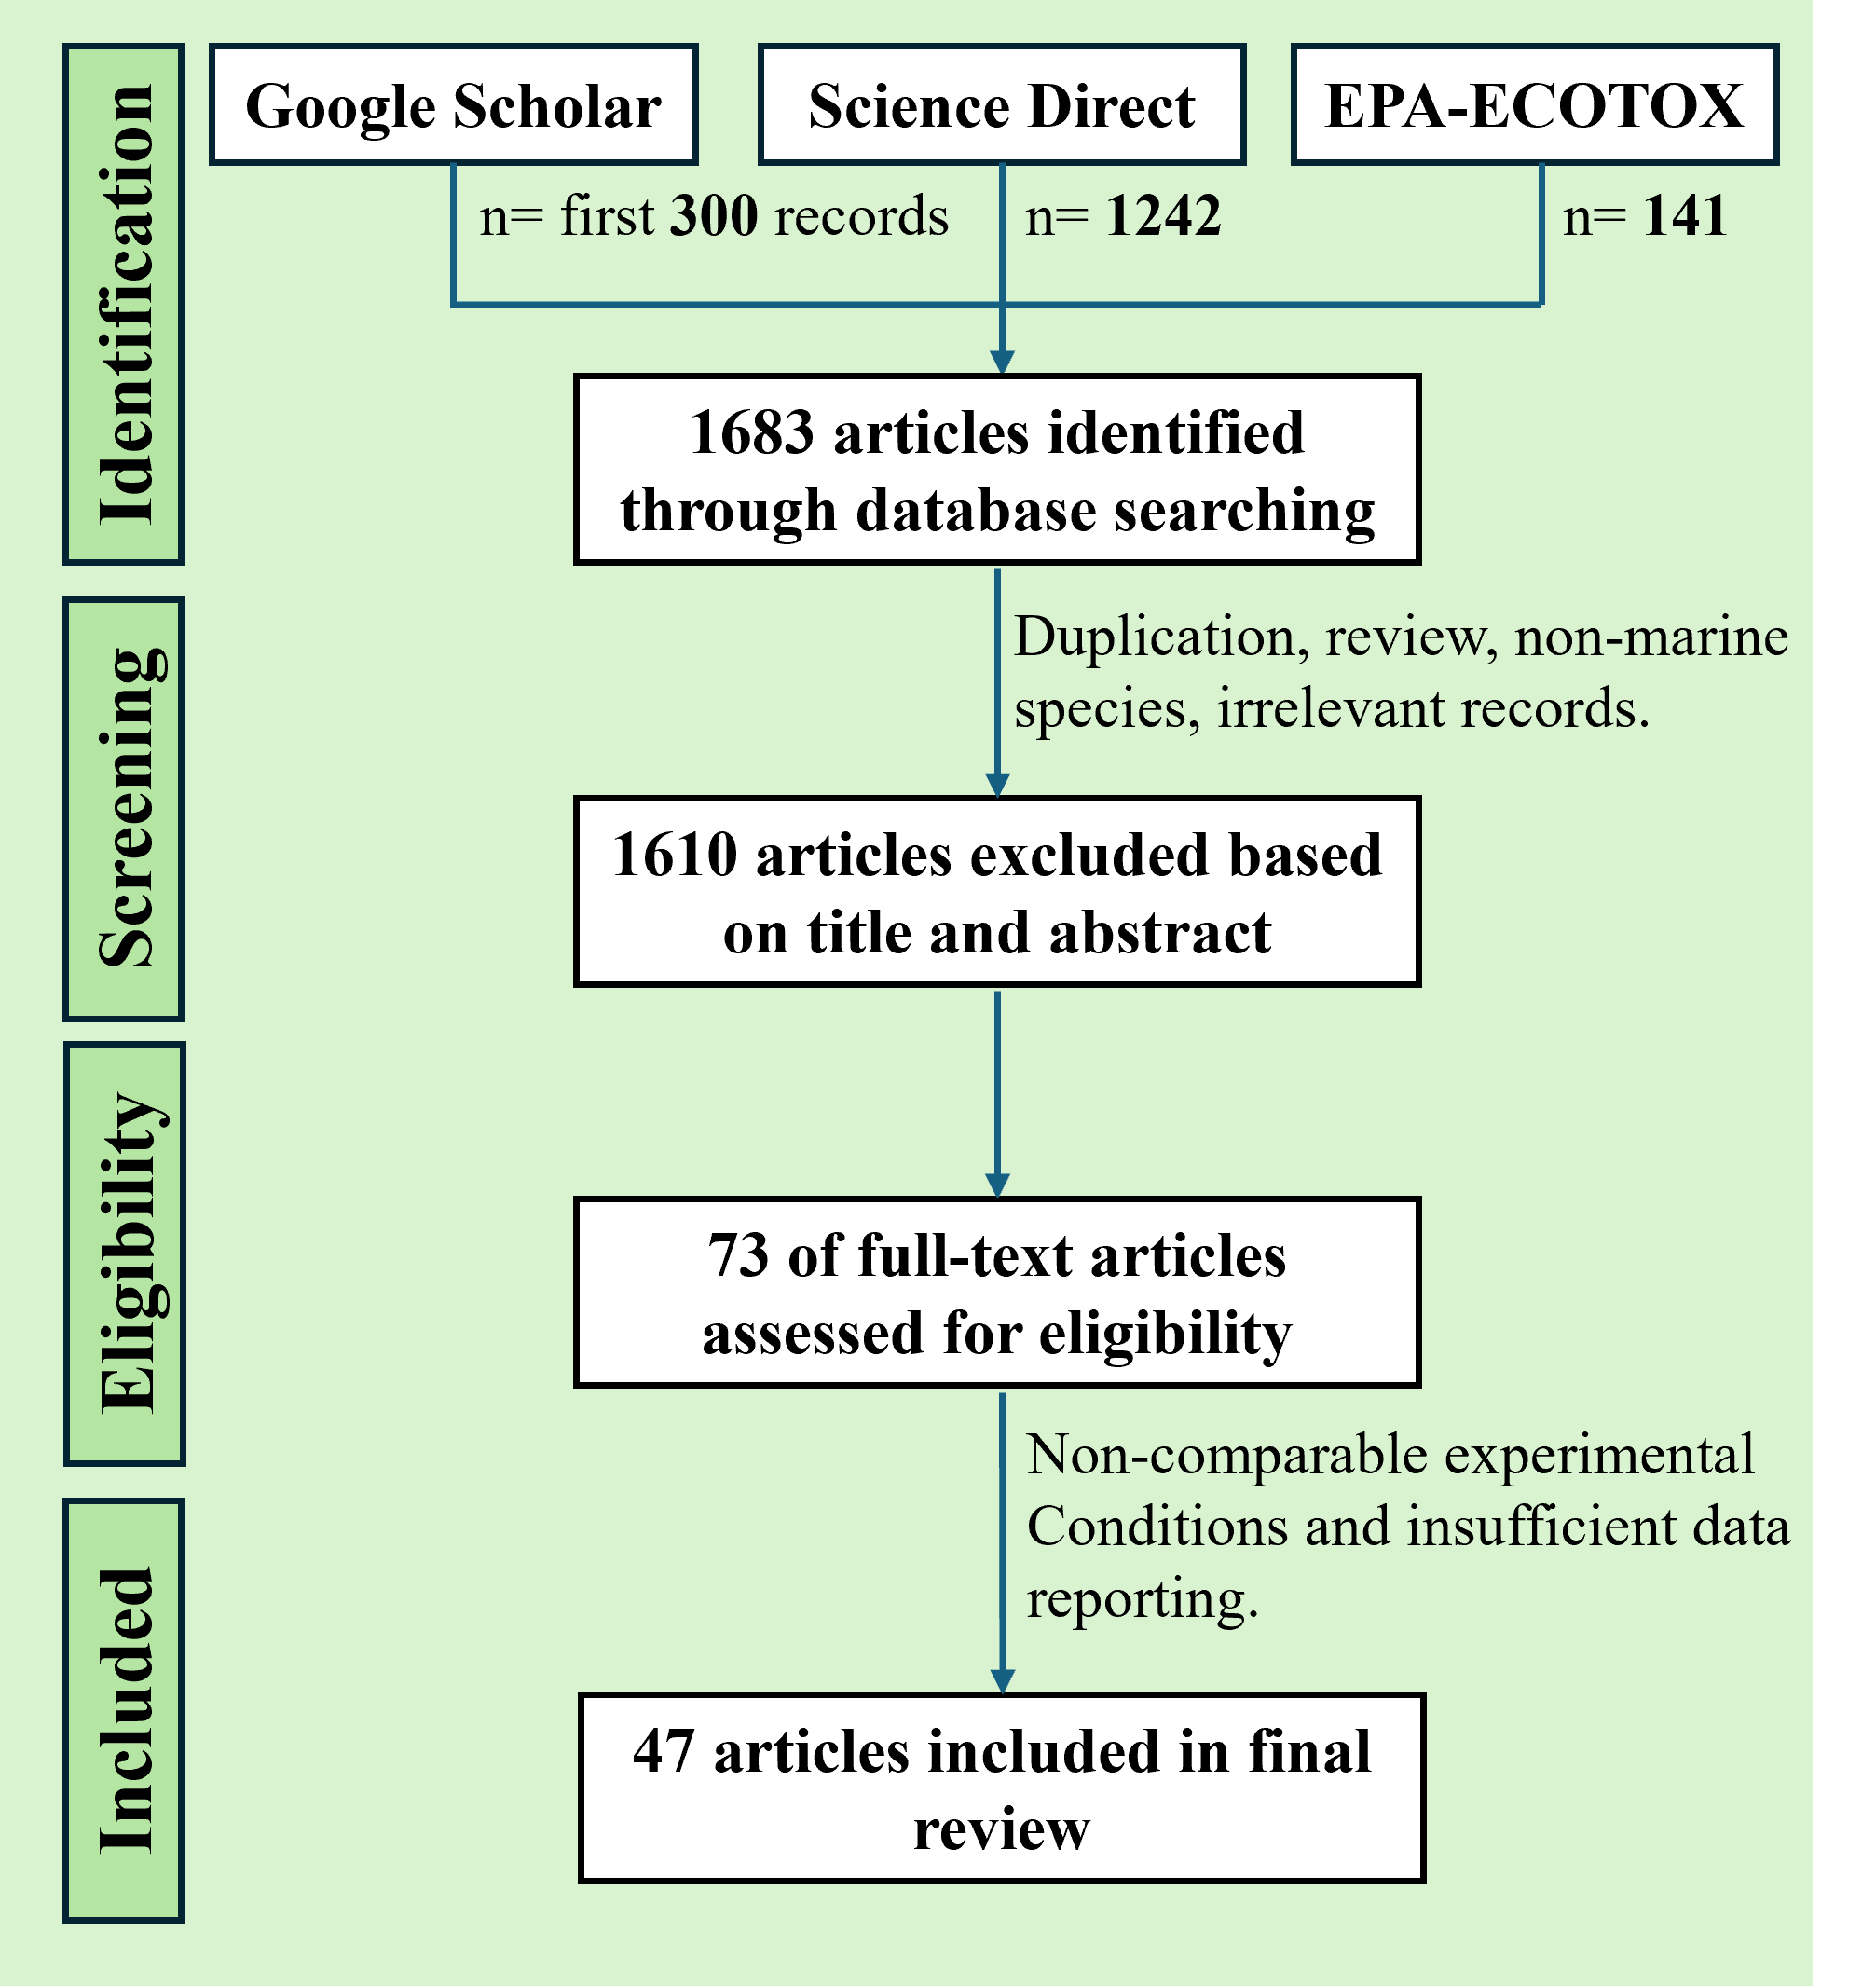


**Figure 2.** Flow diagram of the literature search and study selection process

Table S4. Taxonomic composition of species used for the construction of chlorpyrifos (CPF) species sensitivity distributions (SSDs) in the Latin American and non-Latin American marine datasets.

| Latin name | Phylum | Class | Order | Family | Genus |
| --- | --- | --- | --- | --- | --- |
| *Phaeodactylum tricornutum* | Bacillariophyta | Bacillariophyceae | Naviculales | Phaeodactylaceae | Phaeodactylum |
| *Skeletonema costatum* | Bacillariophyta | Bacillariophyceae | Thalassiosirales | Skeletonemataceae | Skeletonema |
| *Dunaliella tertiolecta* | Chlorophyta | Chlorophyceae | Chlamydomonadales | Dunaliellaceae | Dunaliella |
| *Prorocentrum minimum* | Dinophyta | Dinophyceae | Prorocentrales | Prorocentraceae | Prorocentrum |
| *Acartia tonsa* | Arthropoda | Copepoda | Calanoida | Acartiidae | *Acartia* |
| *Americamysis bahia* | Arthropoda | Malacostraca | Mysida | Mysidae | *Americamysis* |
| *Artemia franciscana* | Arthropoda | Branchiopoda | Anostraca | Artemiidae | *Artemia* |
| *Artemia parthenogenetica* | Arthropoda | Branchiopoda | Anostraca | Artemiidae | *Artemia* |
| *Artemia salina* | Arthropoda | Branchiopoda | Anostraca | Artemiidae | *Artemia* |
| *Artemia sp.* | Arthropoda | Branchiopoda | Anostraca | Artemiidae | *Artemia* |
| *Eriocheir sinensis* | Arthropoda | Malacostraca | Decapoda | Varunidae | *Eriocheir* |
| *Gammarus palustris* | Arthropoda | Malacostraca | Amphipoda | Gammaridae | *Gammarus* |
| *Gladioferens pectinatus* | Arthropoda | Hexanauplia | Calanoida | Centropagidae | *Gladioferens* |
| *Homarus americanus* | Arthropoda | Malacostraca | Decapoda | Nephropidae | *Homarus* |
| *Litopenaeus stylirostris* | Arthropoda | Malacostraca | Decapoda | Penaeidae | *Litopenaeus* |
| *Maja squinado* | Arthropoda | Malacostraca | Decapoda | Majidae | *Maja* |
| *Metapenaeus monoceros* | Arthropoda | Malacostraca | Decapoda | Penaeidae | *Metapenaeus* |
| *Neomysis integer* | Arthropoda | Malacostraca | Mysida | Mysidae | *Neomysis* |
| *Palaemon serratus* | Arthropoda | Malacostraca | Decapoda | Palaemonidae | *Palaemon* |
| *Palaemonetes pugio* | Arthropoda | Malacostraca | Decapoda | Palaemonidae | *Palaemonetes* |
| *Parhyale hawaiensis* | Arthropoda | Malacostraca | Amphipoda | Hyalidae | *Parhyale* |
| *Penaeus sp.* | Arthropoda | Malacostraca | Decapoda | Penaeidae | *Penaeus* |
| *Penaeus vannamei* | Arthropoda | Malacostraca | Decapoda | Penaeidae | *Penaeus* |
| *Sarsamphiascus tenuiremis* | Arthropoda | Copepoda | Harpacticoida | Miraciidae | *Sarsamphiascus* |
| *Siriella armata* | Arthropoda | Malacostraca | Mysida | Mysidae | *Siriella* |
| *Aphanius dispar* | Chordata | Actinopterygii | Cyprinodontiformes | Aphaniidae | *Aphanius* |
| *Aphanius iberus* | Chordata | Actinopterygii | Cyprinodontiformes | Aphaniidae | *Aphanius* |
| *Atherinops affinis* | Chordata | Actinopterygii | Atheriniformes | Atherinopsidae | *Atherinops* |
| *Chanos chanos* | Chordata | Actinopterygii | Gonorynchiformes | Chanidae | *Chanos* |
| *Ciona intestinalis* | Chordata | Ascidiacea | Phlebobranchia | Cionidae | *Ciona* |
| *Gambusia affinis* | Chordata | Actinopterygii | Cyprinodontiformes | Poeciliidae | *Gambusia* |
| *Lates calcarifer* | Chordata | Actinopterygii | Carangiformes | Latidae | *Lates* |
| *Menidia beryllina* | Chordata | Actinopterygii | Atheriniformes | Atherinopsidae | *Menidia* |
| *Mugil cephalus* | Chordata | Actinopterygii | Mugiliformes | Mugilidae | *Mugil* |
| *Oryzias latipes* | Chordata | Actinopterygii | Beloniformes | Adrianichthyidae | *Oryzias* |
| *Psetta maxima* | Chordata | Actinopterygii | Pleuronectiformes | Scophthalmidae | *Scophthalmus* |
| *Tilapia guineensis* | Chordata | Actinopterygii | Cichliformes | Cichlidae | *Tilapia* |
| *Acropora millepora* | Cnidaria | Anthozoa | Scleractinia | Acroporidae | *Acropora* |
| *Paracentrotus lividus* | Echinodermata | Echinoidea | Camarodonta | Parechinidae | *Paracentrotus* |
| *Tisochrysis lutea* | Haptophyta | Coccolithophyceae | Isochrysidales | Isochrysidaceae | Tisochrysis |
| *Aulacomya ater* | Mollusca | Bivalvia | Mytilida | Mytilidae | *Aulacomya* |
| *Donax faba* | Mollusca | Bivalvia | Cardiida | Donacidae | *Donax* |
| *Ischadium recurvum* | Mollusca | Bivalvia | Mytilida | Mytilidae | *Ischadium* |
| *Mytilus galloprovincialis* | Mollusca | Bivalvia | Mytilida | Mytilidae | *Mytilus* |
| *Ruditapes decussatus* | Mollusca | Bivalvia | Venerida | Veneridae | *Ruditapes* |
| *Brachionus plicatilis* | Rotifera | Eurotatoria | Ploima | Brachionidae | *Brachionus* |
| *Proales similis* | Rotifera | Eurotatoria | Ploima | Proalidae | *Proales* |

Table S5. Acute toxicity data of chlorpyrifos on marine organisms Latin America (A). Acute toxicity data of chlorpyrifos on marine organisms Non-Latin America (B).

|  | A. | | | | | | | | | | |
| --- | --- | --- | --- | --- | --- | --- | --- | --- | --- | --- | --- |
|  | Latin name | Group | Effect | Time | Stage life | Endpoint | Concentration  (µg/L) | I.C. | SMAVs  (µg/L) | Place | References |
|  | Artemia franciscana | Arthropod | Mortality | 24 h |  | LC50 | 18000.00 |  | 18000 | Mossoró, Brazil | Varó et al. (1998) |
|  | Artemia persimilis | Arthropod | Mortality | 24 h |  | LC50 | 8450 |  | 8450 | Argentinan | Varó et al. (1998) |
|  | *Parhyale hawaiensis* | Arthropod | Mortality | 96 h | Neonates | LC50 | 0.32 | 0.11-0.93 | - | Cd del Carmen, Mexico, Gulf of Mexico | This study |
|  | *Parhyale hawaiensis* | Arthropod | Mobility | 96 h | Neonates | EC50 | 0.1 | 0.03-0.33 | 0.178 | Cd del Carmen, Mexico, Gulf of Mexico | This study |
|  | *Penaeus sp.* | Arthropod | Mortality | 48 h |  | LC50 | 2.07 |  | 2.07 | Mazatlán, Sinaloa, México | Osuna et al. (1997) |
| *Penaeus vannamei* | | Arthropod | Mortality | 96 h |  | LC50 | 2.10 | 2.04–2.16 | - | CENIACUA, Cartagena, Colombia | Duarte-Restrepo et al. (2020) |
|  | *Penaeus vannamei* | Arthropod | Mortality | 48 h |  | LC50 | 4.8 |  | 2.1 | Sinaloa, Mexico | Galindo et al. (1996) |
|  | *Litopenaeus stylirostris* | Arthropod | Mortality | 48 h |  | LC50 | 2265.70 |  | 2265.7 | California Gulf  Mexico | Galindo et al. (2002) |
|  | *Aulacomya ater* | Molluscs | Mortality | 96 h |  | LC50 | 16.00 |  | 16 | Coliumo Bay, Chile | Führer et al. (2012) |
|  | *Ischadium recurvum* | Molluscs | Mortality | 96 h |  | LC50 | 960 | 890-1040 | 960 | Florida, USA | Hemming and Waller. (2004) |
|  | *Proales similis* | Rotifer | Mortality | 24 h | neonates | LC50 | 280 | 197–405 | 280 | northwestern Mexico | Arreguin-Rebolledo et al. (2023) |
|  |  |  |  |  |  |  |  |  |  |  |  |

B.

|  | Latin name | Group | Effect | | | Time | Stage life | Endpoint | Concentration  (µg/L) | I.C. | SMAVs  (µg/L) | Place | References |
| --- | --- | --- | --- | --- | --- | --- | --- | --- | --- | --- | --- | --- | --- |
|  | *Dunaliella tertiolecta* | Algae | | Growth | 96 h | |  | EC50 | 769 | 727–814 | 769 | Texas USA | DeLorenzo and Serrano (2003) |
|  | *Phaeodactylum tricornutum* | Algae | | Growth | 72 h | |  | EC50 | 1117 | 1047–1229 | 1117 | Spain | Tato and Beiras (2019） |
|  | *Prorocentrum minimum* | Algae | | Growth | 96 h | |  | EC50 | 221.385 |  | 221.385 | Laizhou Bay China | Ge et al. (2025) |
|  | *Skeletonema costatum* | Algae | | Growth | 96 h | |  | EC50 | 572 |  | - | China | Zhang et al. (2023） |
|  | *Skeletonema costatum* | Algae | | Growth | 96 h | |  | EC50 | 574.112 |  | 573.055 | Laizhou Bay China | Ge et al. (2025) |
|  | *Tisochrysis lutea* | Algae | | Growth | 72 h | |  | EC50 | 246.3 | 213-301 | 246.3 | Spain | Tato and Beiras (2019) |
|  | *Acartia tonsa* | Arthropod | | Mortality | 48 h | |  | LC50 | 1.34 | 0.35-5.31 | - | Spain | Bellas and Gil. (2020) |
|  | *Acartia tonsa* | Arthropod | | Feeding | 48 h | |  | EC50 | 0.77 | 0.20-3.01 | - | Spain | Bellas and Gil. (2020) |
|  | *Acartia tonsa* | Arthropod | | Fecundity | 48 h | |  | EC50 | 1.07 | 0.21-5.48 | - | Spain | Bellas and Gil. (2020) |
|  | *Acartia tonsa* | Arthropod | | Development | 48 h | |  | EC50 | 4.01 | 1.27-12.69 | - | Spain | Bellas and Gil. (2020) |
|  | *Acartia tonsa* | Arthropod | | Population | 48 h | |  | EC50 | 0.50 | 0.19-1.30 | 1.172 | Spain | Bellas and Gil. (2020) |
|  | *Americamysis bahia* | Arthropod | | Mortality | 96 h | |  | LC50 | 0.029 | 0.016-0.045 | 0.029 | South Caroline USA | Key et al. (2013) |
|  | *Sarsamphiascus tenuiremis* | Arthropod | | Mortality | 96 h | | Male | LC50 | 0.610 | 0.12–1.27 | - | South Caroline USA | Bejarano et al. (2005) |
|  | *Sarsamphiascus tenuiremis* | Arthropod | | Mortality | 96 h | | Female | LC50 | 3.56 | 2.23–5.16 | 1.473 | South Caroline USA | Bejarano et al. (2005) |
|  | *Artemia franciscana* | Arthropod | | Mortality | 24 h | |  | LC50 | 18000.00 |  | - | San Francisco, CA, USA | Varó et al. (1998) |
|  | *Artemia franciscana* | Arthropod | | Mortality | 24 h | |  | LC50 | 18000.00 |  | 18000 | Utah, USA | Varó et al. (1998) |
|  | *Artemia parthenogenetica* | Arthropod | | Mortality | 24 h | |  | LC50 | 1990 |  | - | Bonmatí (Alicante), Spain | Varó et al. (1998) |
|  | *Artemia parthenogenetica* | Arthropod | | Mortality | 24 h | |  | LC50 | 4510 |  | - | Xiao Tan (Shandong), China | Varó et al. (1998) |
|  | *Artemia parthenogenetica* | Arthropod | | Mortality | 24 h | |  | LC50 | 10950 |  | - | Petrola (Albacate) Spain | Varó et al. (1998) |
|  | *Artemia parthenogenetica* | Arthropod | | Mortality | 24 h | |  | LC50 | 18000 |  | - | Olmeda (Guadalajara), Spain | Varó et al. (1998) |
|  | *Artemia parthenogenetica* | Arthropod | | Mortality | 24 h | |  | LC50 | 18000 |  | - | Delta del Ebro (Tarragona), Spain | Varó et al. (1998) |
|  | *Artemia parthenogenetica* | Arthropod | | Mortality | 24 h | |  | LC50 | 18000 |  | - | Bjurliu Lake, Kazakstan | Varó et al. (1998) |
|  | *Artemia parthenogenetica* | Arthropod | | Mortality | 24 h | |  | LC50 | 18000 |  | - | Gerri (Lérida), Spain | Varó et al. (1998) |
|  | *Artemia parthenogenetica* | Arthropod | | Mortality | 24 h | |  | LC50 | 18000 |  | - | Torrevieja (Alicante), Spain | Varó et al. (1998) |
|  | *Artemia parthenogenetica* | Arthropod | | Mortality | 24 h | | Nauplii | LC50 | 18000 |  | - | Torrevieja (Alicante), Spain | Varó et al. (2000) |
|  | *Artemia parthenogenetica* | Arthropod | | Mortality | 24 h | | Juveniles | LC50 | 3900 |  | - | Torrevieja (Alicante), Spain | Varó et al. (2000) |
|  | *Artemia parthenogenetica* | Arthropod | | Mortality | 24 h | | Adults | LC50 | 80 |  | 6604.491 | Torrevieja (Alicante), Spain | Varó et al. (2000) |
|  | *Artemia salina* | Arthropod | | Mortality | 48 h | |  | LC50 | 6 | 2–9 | - | Cádiz, Spain | Albendin et al. (2021) |
|  | *Artemia salina* | Arthropod | | Mortality | 24 h | |  | LC50 | 385 | 90-670 | - | Snowville, USA | Rao et al. (2007) |
|  | *Artemia salina* | Arthropod | | Development | 24 h | |  | EC50 | 123 |  | - | Snowville, USA | Rao et al. (2007) |
|  | *Artemia salina* | Arthropod | | Mortality | 24 h | |  | LC50 | 950 |  | - | Megrine, Tunissia | Varó et al. (1998) |
|  | *Artemia salina* | Arthropod | | Mortality | 24 h | |  | LC50 | 1860 |  | - | Málaga, Spain | Varó et al. (1998) |
|  | *Artemia salina* | Arthropod | | Mortality | 24 h | |  | LC50 | 5120 |  | - | Chott Garaet et Tarf, Argelia | Varó et al. (1998) |
|  | *Artemia salina* | Arthropod | | Mortality | 24 h | |  | LC50 | 3190.000 |  | 503.469 | Torrevieja (Alicante), Spain | Varó et al. (1998) |
|  | *Artemia sp.* | Arthropod | | Mortality | 24 h | |  | LC50 | 1967 |  | 1967 | Italy | Guzzella et al. (1997) |
|  | *Eriocheir sinensis* | Arthropod | | Mortality | 96 h | |  | LC50 | 23.65 |  | 23.65 | China | Li et al. (2006) |
|  | *Gladioferens pectinatus* | Arthropod | | Mortality | 48 h | | Nauplii | LC50 | 4.3 | 3.8–4.9 | 4.3 | New Zealand - Portobello Bay to Karepiro Bay | Charry et al. (2019) |
|  | *Gammarus palustris* | Arthropod | | Mortality | 96 h | |  | LC50  Static | 0.30 | 0.12-0.79 | - | South Carolina, USA | Leight and Van Dolah (1999) |
|  | *Gammarus palustris* | Arthropod | | Mortality | 96 h | |  | LC50  Renew | 0.19 | 0.15-0.24 | 0.238 | South Carolina,  USA | Leight and Van Dolah (1999) |
|  | *Maja squinado* | Arthropod | | Mortality | 48 h | | zoea I | LC50 | 0.79 | 0.52–1.19 | 0.79 | Rıa de Arousa Galicia, NW Spain | Bellas et al. (2005) |
|  | *Homarus americanus* | Arthropod | | Mortality | 48 h | |  | LC50 | 1.33 |  | 1.33 | Canada | Taylor et al. (2019) |
|  | *Neomysis integer* | Arthropod | | Mortality | 96 h | |  | LC50 | 0.13 | 0.11–0.16 | - | Looe River Estuary (Cornwall, UK) | Roast et al. (1999) |
|  | *Neomysis integer* | Arthropod | | Mortality | 96 h | |  | LC50 | 0.19 | 0.16–0.23 | 0.157 | Looe River Estuary (Cornwall, UK) | Roast et al. (1999) |
|  | *Palaemon serratus* | Arthropod | | Mortality | 48 h | | zoea I | LC50 | 0.22 | 0.16–0.29 | 0.22 | Rıa de Arousa Galicia, NW Spain | Bellas et al. (2005) |
|  | *Palaemonetes pugio* | Arthropod | | Mortality | 96 h | |  | LC50 | 0.69 | 0.36–0.97 | - | South Caroline USA | Key et al. (2013) |
|  | *Palaemonetes pugio* | Arthropod | | Mortality | 96 h | | Newly hatched | LC50 | 0.15 | 0.11–0.18 | - | Leadenwah Creek – South Carolina | Key and Fulton. (2006) |
|  | *Palaemonetes pugio* | Arthropod | | Mortality | 96 h | | 18  day-old | LC50 | 0.46 | 0.36–0.58 | - | Leadenwah Creek – South Carolina | Key and Fulton (2006) |
|  | *Palaemonetes pugio* | Arthropod | | Mortality | 96 h | | Post larvae | LC50 | 0.15 | 0.13–0.18 | - | Leadenwah Creek – South Carolina | Key and Fulton. (2006) |
|  | *Palaemonetes pugio* | Arthropod | | Mortality | 24 h | | Newly hatched | EC50 | 0.42 | 0.29–0.60- | - | Leadenwah Creek – South Carolina | Key and Fulton. (2006) |
|  | *Palaemonetes pugio* | Arthropod | | Mortality | 24 h | | 18  day-old | EC50 | 0.27 | 0.21–0.35 | - | Leadenwah Creek – South Carolina | Key and Fulton. (2006) |
|  | *Palaemonetes pugio* | Arthropod | | Mortality | 24 h | | Post  larvae | EC50 | 0.87 | 0.62–1.23 | 0.354 | Leadenwah Creek – South Carolina | Key and Fulton. (2006) |
|  | *Penaeus vannamei* | Arthropod | | Mortality | 96 h | | Post larvae | LC50 | 0.68 | 0.50–0.87 | - | Goa (India) | Pawar et al. (2020) |
|  | *Penaeus vannamei* | Arthropod | | Mortality | 96 h | | Juveniles | LC50 | 0.73 | 0.69–1.06 | 0.704 | Goa (India) | Pawar et al. (2020) |
|  | *Siriella armata* | Arthropod | | Mortality | 96 h | | Neonates  <24 h old | LC50 | 0.13 |  | 0.13 | Galicia, NW Iberian Peninsula | Pérez et al. (2015) |
|  | *Metapenaeus monoceros* | Arthropod | | Mortality | 24 h | | Juveniles | LC50 | 0.1 |  | 0.1 | Sandspit mangrove - Pakistan | Shoaib and Siddiqui (2015) |
|  | *Ciona intestinalis* | Fish | | Development | 48 h | | Embryos | EC50 | 5666 | 5087–6349 | 5666 | Ria de Vigo Galicia, Spain | Bellas et al. (2005) |
|  | *Acropora millepora* | Cnidaria | | Development | 96 h | | Larvae  6 d old | EC50 | 1 |  | 1 | High Island - Australian | Markey et al. (2007) |
|  | *Paracentrotus lividus* | Echinoderm | | Development | 48 h | | Embryos | EC50 | 300 | 350–400 | - | Ria de Vigo Galicia, Spain | Bellas et al. (2005) |
|  | *Paracentrotus lividus* | Echinoderm | | Development | 48 h | | Embryos | EC50 | 269.6 |  | - | Ria de Vigo Galicia, Spain | Rial et al. (2023) |
|  | *Paracentrotus lividus* | Echinoderm | | Development | 48 h | | Embryos | EC50 | 194.6 |  | 250.607 | Bay of Naples, Italy | Buono et al. (2012) |
|  | *Aphanius dispar* | Fish | | Mortality | 24 h | | Juveniles | LC50 | 2.50 |  | 2.5 | Sandspit mangrove Pakistan | Shoaib et al. (2012) |
|  | *Mugil cephalus* | Fish | | Mortality | 96 h | | Juvenile | LC50 | 1.12 | 1.03-1.22 | - | Kovalam - India | Marigoudar et al. (2018b) |
|  | *Mugil cephalus* | Fish | | Mortality | 96 h | | Larvae | LC50 | 3.45 | 2.77–4.06 | 1.965 | Goa, India | Dake et al. (2021) |
| *Aphanius iberus* | | Fish | | Mortality | 72 h | |  | LC50 | 18.01 |  | 18.01 | Valencian, Spain | Varó et al. (2000) |
|  | *Atherinops affinis* | Fish | | Mortality | 96 h | | Larvae  7 d old | LC50 | 4.50 | 3.4-5.9 | 4.5 | Granite Canyon, California - USA | Hemmer et al. (1992) |
|  | *Chanos chanos* | Fish | | Mortality | 96 h | |  | LC50 | 3.56 |  | - | Pamban coasts - India | Palanikumar et al. (2014) |
|  | *Chanos chanos* | Fish | | Mortality | 96 h | | Juvenile | LC50 | 3.20 | 2.19-5.83 | 3.375 | Chennai, Tamil Nadu - India | Marigoudar et al. (2018b) |
|  | *Gambusia affinis* | Fish | | Mortality | 96 h | |  | LC50 | 520.00 |  | 520 | Castellón Spain | Varó et al. (2000) |
|  | *Lates calcarifer* | Fish | | Mortality | 96 h | | Juvenile | LC50 | 1.07 | 0.95–1.19 | 1.07 | Tamil Nadu, India. | Marigoudar et al. (2018a) |
|  | *Menidia beryllina* | Fish | | Mortality | 96 h | |  | LC50 | 10.20 | 9.0-1 1.6 | 10.2 | Blackwater Bay – Florida USA | Hemmer et al. (1992) |
|  | *Oryzias latipes* | Fish | | Mortality | 96 h | |  | LC50 | 120.00 |  | 120 | Kyushu, Japan | Khalil et al. (2013) |
|  | *Psetta maxima* | Fish | | Mortality | 48 h | | Embryos | LC50 | 116.6 | 77.4–173.2 | - | Mougás, Galicia, NWSpain | [Mhadhbi](https://link.springer.com/article/10.1007/s11270-012-1328-9#auth-Lazhar-Mhadhbi-Aff1-Aff2) and Beiras. (2012) |
|  | *Psetta maxima* | Fish | | Mortality | 96 h | | Larvae | LC50 | 94.65 | 69.2–154.3 | 105.053 | Mougás, Galicia, NWSpain | [Mhadhbi](https://link.springer.com/article/10.1007/s11270-012-1328-9#auth-Lazhar-Mhadhbi-Aff1-Aff2) and Beiras. (2012) |
|  | *Tilapia guineensis* | Fish | | Mortality | 96 h | | Juvenile | LC50 | 2.00 |  | 2 | Nigeria | Chindah et al. 2004 |
|  | *Donax faba* | Molluscs | | Mortality | 96 h | |  | LC50 | 247.72 | 112.2-445.9 | 247.72 | PalkBay Coast - India | Janakidevi et al. (2013) |
|  | *Mytilus galloprovincialis* | Molluscs | | Development | 48 h | | Larvae | EC50 | 153.50 | 137–172.6 | - | Vigo, Galicia, Spain | Beiras and Bellas (2008) |
|  | *Mytilus galloprovincialis* | Molluscs | | Physiology | 96 h | |  | EC50 | 4500 |  | - | Cesenatico, North-East Italy | Dondero et al. (2011) |
|  | *Mytilus galloprovincialis* | Molluscs | | Mortality | 96 h | |  | LC50 | 22500.00 |  | - | Mediterranean Spanish coast | Serrano et al. (1995) |
|  | *Mytilus galloprovincialis* | Molluscs | | Development | 48 h | | Embryos | EC50 | 224.9 |  | 1367.329 | Vigo, Galicia, Spain | Rial et al. (2023) |
|  | *Ruditapes decussatus* | Molluscs | | Mortality | 96 h | |  | LC50 | 308.06 | 242.4–394.3 | - | Oued Maltine, Tunisian, Mediterranean | Fathallah (2014) |
|  | *Ruditapes decussatus* | Molluscs | | Embryotoxicity | 96 h | |  | EC50 | 339.5 | 254.6–470 | 323.398 | Oued Maltine, Tunisian, Mediterranean | Fathallah (2014) |
|  | *Brachionus plicatilis* | Rotifer | | Mortality | 24 h | | Neonates | EC50 | 1667 |  | - | Italy | Guzzella et al. (1997) |
|  | *Brachionus plicatilis* | Rotifer | | Mortality | 24 h | |  | LC50 | 10670.00 | 9310-12030 | 4217.450 | *Valencia*, Spain | Ferrando and Andreu-Moliner (1991) |
|  |  |  | |  |  | |  |  |  |  |  |  |  |
|  |  |  | |  |  | |  |  |  |  |  |  |  |
|  |  | | | | | | | | | | | | |

Table S6. Goodness-of-fit statistics for distribution models used in SSD fitting corresponding to (A). Latin American and (B). Non-Latin American. AD: Anderson-Darling statistic; KS: Kolmogorov-Smirnov statistic; CvM: Cramer-von Mises statistic; AIC: Akaike´s Information Criterion; AICC: Akaike´s Information Criterion corrected for sample size; BIC: Bayesian Information Criterion; DELTA: Information Criterion differences; Weight: Information Criterion weight. “DELTA” and “Weight” are based on “AIC” for censored data and “AICC” for non-censored data. Optimal distribution.

A.

| Distribution | AD | KS | CvM | AIC | AICc | BIC | DELTA | Weight |
| --- | --- | --- | --- | --- | --- | --- | --- | --- |
| Gamma | 0.293 | 0.187 | 0.0442 | 137 | 139 | 137 | 0 | 0.285 |
| Weibull | 0.309 | 0.177 | 0.0482 | 137 | 139 | 137 | 0.298 | 0.245 |
| Log-normal | 0.348 | 0.174 | 0.0578 | 137 | 139 | 138 | 0.598 | 0.211 |
| Log-logistic | 0.338 | 0.175 | 0.0543 | 138 | 140 | 139 | 1.56 | 0.131 |
| Gumbel | 0.383 | 0.2 | 0.0631 | 138 | 140 | 139 | 1.61 | 0.128 |
| Log-normal-log-normal | 0.162 | 0.12 | 0.0196 | 139 | 159 | 140 | 20.2 | 0 |

B.

| Distribution | AD | KS | CvM | AIC | AICC | BIC | DELTA | Weight |
| --- | --- | --- | --- | --- | --- | --- | --- | --- |
| Log-normal-log-normal | 0.159 | 0.057 | 0.022 | 467 | 469 | 476 | 0 | 0.956 |
| Log-normal | 0.983 | 0.153 | 0.189 | 476 | 476 | 480 | 7.64 | 0.021 |
| Gumbel | 0.797 | 0.154 | 0.139 | 476 | 477 | 480 | 7.98 | 0.018 |
| Log-logistic | 1.05 | 0.145 | 0.188 | 480 | 480 | 484 | 11.7 | 0.003 |
| Weibull | 1.15 | 0.182 | 0.207 | 481 | 481 | 484 | 12.2 | 0.002 |
| Gamma | 2.04 | 0.21 | 0.377 | 488 | 489 | 492 | 19.9 | 0 |

**Table S7.** Chlorpyrifos concentrations detected in marine ecosystems to Latin America (A). non-Latin America (B), and their corresponding risk quotient (RQ) values

A)

| **Place** | **Concentrations µg/L** | **RQ** | **Reference** |
| --- | --- | --- | --- |
| Laguna de terminos, Mexico | **0.000072** | 0.002 | Carvalho et al., 2009 |
| North-central coastal zone of Sinaloa, Mexico. | **0.03**  **0.11** | 0.94  3.44 | Leyva-Morales et al., 2024 |
| Gulf California | **1.5** | 47 | Arellano-Aguilar et al., 2017 |
| Navachiste coastal lagoon | **1.7** | 53,3 | Arellano-Aguilar et al., 2017 |
| Pabelloes coastal lagoon | **1.39** | 43.57 | Arellano-Aguilar et al., 2017 |

B)

| **Place** | **Concentrations µg/L** | **RQ** | **Reference** |
| --- | --- | --- | --- |
| Laizhou Bay, China. | **0.000351**  **0.001091** | 0.00626  0.019 | Ge et al., 2025 |
| Everglades South Florida | **0.0062** | 0.11 | Carrier and Rand., 2008 |
| Mar Menor lagoon - Spain | **0.052**  **0.20** | 0.92  3.57 | Campillo et al., 2013 |
| Mar Menor lagoon - Spain | **0.0458** | 0.81 | Moreno-Gonzalez et al., 2013 |
| Bohai Bay | **0.00032** | 0.005 | Zhao et al., 2025 |
| Lagoa de Sto André – Estuarine waters- Portugal | **3.7** | 66.07 | Sousa et al., 2020 |
| Fuseta -Estuarine waters -Portugal | **4.095** | 73.125 | Sousa et al., 2020 |
| Tavira – Seawater - Portugal | **0.226** | 4.03 | Sousa et al., 2020 |
