# Supplementary material
Source: Research Square preprint supplement (doi:10.21203/rs.3.rs-9519932/v1)

**GA**


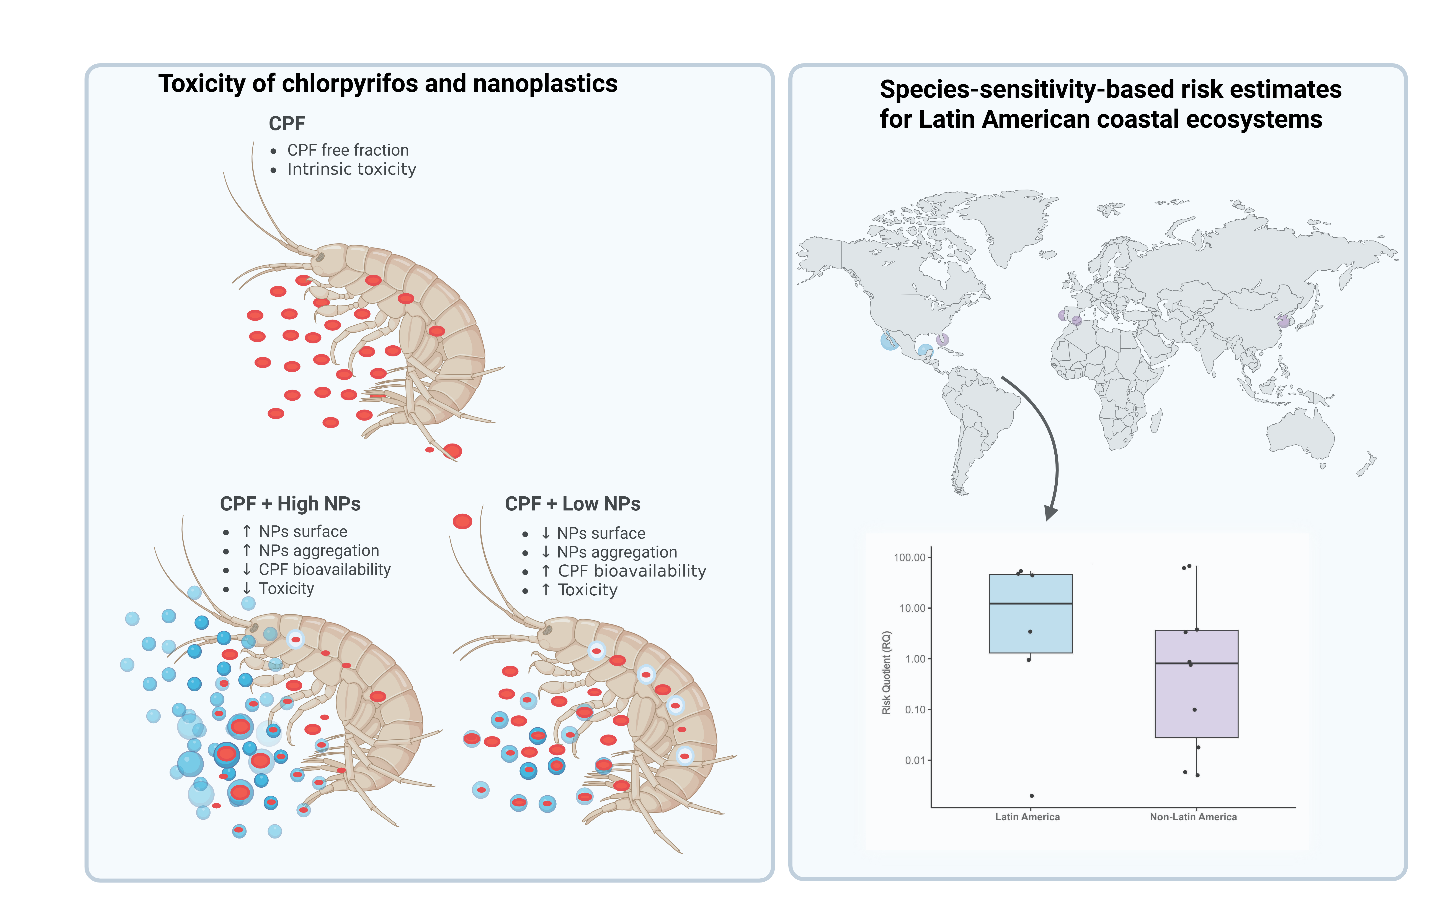

Supplement: Supplementary file 1 [file 5a1f022c3de399cfb91747d5.docx]
